1 **Nuclear and mitochondrial genomic resources for the meltwater stonefly, *Lednia tumana***  
2 **Ricker, 1952 (Plecoptera: Nemouridae)**

3

4 Scott Hotaling<sup>a,b\*</sup>, Joanna L. Kelley<sup>a</sup>, and David W. Weisrock<sup>b</sup>

5

6 <sup>a</sup> School of Biological Sciences, Washington State University, Pullman, WA, USA; <sup>b</sup> Department  
7 of Biology, University of Kentucky, Lexington, KY, USA

8

9 \* Scott Hotaling, School of Biological Sciences, Washington State University, Pullman, WA,  
10 99164, USA; Email: [scott.hotaling@wsu.edu](mailto:scott.hotaling@wsu.edu); Phone: (828) 507-9950; ORCID: 0000-0002-  
11 5965-0986

12 **Abstract:**

13 With more than 3,700 described species, stoneflies (Order Plecoptera) are an important  
14 component of global aquatic biodiversity. The meltwater stonefly *Lednia tumana* (Ricker, 1952;  
15 Family Nemouridae) is endemic to alpine streams of Glacier National Park and has been  
16 petitioned for listing under the U.S. Endangered Species Act (ESA) due to climate change-  
17 induced loss of alpine glaciers and snowfields. Here, we present *de novo* assemblies of the  
18 nuclear (~520 million base pairs [bp]) and mitochondrial (15,014-bp) genomes for *L. tumana*.  
19 The *L. tumana* nuclear genome is the most complete stonefly genome reported to date, with  
20 ~71% of genes present in complete form and more than 4,600 contigs longer than 10-kilobases  
21 (kb). The *L. tumana* mitochondrial genome is the second for the family Nemouridae and the first  
22 from North America. Together, both genomes represent important foundational resources, setting  
23 the stage for future efforts to understand the evolution of *L. tumana*, stoneflies, and aquatic  
24 insects worldwide.

25  
26 **Keywords:** Plecoptera; Nemouridae; *Lednia*; genomics; nuclear genome; USA

27  
28 **Introduction:**

29 Stoneflies are a diverse, globally distributed group of hemimetabolous insects that  
30 diverged from their closest relatives (e.g., Orthoptera, Dermaptera, Zoraptera) at least 300  
31 million years ago in the Carboniferous Period (Béthoux, Cui, Kondratieff, Stark, and Ren 2011).  
32 With more than 3,700 described species, stoneflies account for a substantial portion of  
33 freshwater biodiversity (DeWalt, Kondratieff, and Sandberg 2015). The meltwater stonefly,  
34 *Lednia tumana* (Ricker, 1952; Plecoptera: Nemouridae), resides in alpine streams of Glacier  
35 National Park (GNP), USA, where it is iconic of habitat loss due to climate change in the region  
36 (Muhlfeld et al. 2011; Giersch, Hotaling, Kovach, Jones and Muhlfeld 2017). *Lednia tumana* is  
37 one of four extant species in the genus *Lednia* which all exhibit alpine, cold-water distributions  
38 in western North America (Baumann and Kondratieff 2010; Baumann and Call 2012). The  
39 majority of *L. tumana*'s habitat is supported by seasonal melting of permanent ice and snow, a  
40 habitat type that is under considerable threat of near-term loss as the global cryosphere recedes  
41 (Hotaling, Finn, Giersch, Weisrock, and Jacobsen 2017; Hotaling et al. 2019). The recent  
42 evolutionary history of *L. tumana* is closely tied to glacier dynamics with present-day genetic

43 clusters arising in parallel with ice sheet recession at the end of the Pleistocene (~20,000 years  
44 ago, Hotaling et al. 2018). Genetic evidence has also highlighted a possible loss of mitochondrial  
45 genetic diversity for the species on even more recent, decadal timescales (Jordan et al. 2016).  
46 With such a narrow habitat niche in a small, mountainous region of the northern Rocky  
47 Mountains, *L. tumana* has been recommended for listing under the U.S. Endangered Species Act  
48 (US Fish & Wildlife Service 2016).

49 In this study, we present an assembly of the nuclear genome for *L. tumana*, the most  
50 complete nuclear genome for the order Plecoptera reported to date. This resource also represents  
51 one of only three high-coverage (> 50x) genomes for any EPT taxon (Ephemeroptera, *Ephemera*  
52 *danica*, Polechau et al. 2014; Plecoptera, this study; Trichoptera, *Stenopsyche tienmushanensis*,  
53 Luo, Tang, Frandsen, Stewart, and Zhou 2018), a globally important group of aquatic organisms  
54 commonly used for biological monitoring (e.g., Tronstad, Hotaling, and Bish 2016). We also  
55 present a nearly complete mitochondrial genome assembly (mitogenome) for *L. tumana*, the  
56 fourth for the stonefly family Nemouridae after two previous studies (Chen and Du 2017; Cao,  
57 Wang, Huang, and Li 2019).

58

## 59 **Materials and Methods:**

60 Genomic DNA was extracted using a Qiagen DNeasy Blood & Tissue Kit from a single  
61 *L. tumana* nymph collected in 2013 from Lunch Creek in GNP. Prior to extraction, both the head  
62 and as much of the digestive tract as possible were removed. A whole-genome shotgun  
63 sequencing library targeting a 250-bp fragment size was constructed and sequenced by the  
64 Florida State University Center for Genomics. The library was sequenced twice on 50% of an  
65 Illumina HiSeq2500 flow cell each time with paired-end, 150-bp chemistry, resulting in  
66 242,208,840 total reads. The size of the *L. tumana* nuclear genome was estimated using a kmer-  
67 based approach in sga preQC (Simpson 2014). Read quality was assessed with fastQC (Andrews  
68 2010) and low-quality reads were either trimmed or removed entirely using TrimGalore (Krueger  
69 2015) with the flags: --stringency 3 --quality 20 --length 40. We assembled the nuclear genome  
70 using SPAdes v3.11.1 with default settings (Bankevich et al. 2012) and generated summary  
71 statistics with the Assemblathon2 perl script (assemblathon\_stats.pl, Bradnam et al. 2013). The  
72 completeness of our nuclear assembly was assessed by calculating the number of conserved  
73 single copy orthologous genes [Benchmarking Universal Single-Copy Orthologs (BUSCOs)] in

74 the assembly using BUSCO v3 and the 1,658 “insecta\_ob9” set of reference genes (Simão,  
75 Waterhouse, Ioannidis, Kriventseva, and Zdobnov 2015). To compare the completeness of the *L.*  
76 *tumana* genome in the context of other stoneflies, we downloaded the two other publicly  
77 available stonefly genomes for *Isoperla grammatica* (Poda, 1761; Perlodidae) and *Amphinemura*  
78 *sulcicollis* (Stephens, 1836; Nemouridae) which are deposited under GenBank BioProject  
79 PRJNA315680 (Macdonald, Cunha, and Bruford 2016; Macdonald, Ormerod, and Bruford  
80 2017). We performed the same BUSCO and Assemblathon2 analyses on the *I. grammatica* and  
81 *A. sulcicollis* genomes as we did for *L. tumana* above.

82 We assembled the *L. tumana* mitogenome with NOVOPlasty v2.6.7 (Dierckxsens,  
83 Mardulyn, and Smits 2016) using an 872-bp segment of the *L. tumana cytb* gene (GenBank  
84 KX212756.1) as the “seed” sequence. After assembly, the mitogenome was annotated through a  
85 combination of the MITOS web server with default settings (Bernt et al. 2013) and comparison  
86 to the *Nemoura nanikensis* mitogenome (Plecoptera: Nemouridae; Chen and Du 2017).  
87 However, in this initial assembly, the 16S gene was fragmented and the 12S gene was missing  
88 entirely. To mitigate this, we extracted sequences for both genes from the *N. nanikensis*  
89 mitogenome (Plecoptera: Nemouridae; Chen and Du 2017) and mapped our raw reads to these  
90 reference sequences for each gene with BWA-MEM v0.7.12-r1039 (Li 2013) using the default  
91 settings. Next, we used bcftools v1.9 (Li, Orti, Zhang, and Lu 2009) to collect summary  
92 information on the read mapping and genotype likelihoods (‘mpileup’ with default settings),  
93 called consensus nucleotides (‘call’ with -m flag), and output the consensus sequence  
94 (‘consensus’ with default settings). Finally, we used samtools v1.7 (Li et al. 2009) to calculate  
95 coverage depth per nucleotide for each sequence and masked consensus bases with no coverage  
96 (i.e., bases with no information from the *L. tumana* read mapping). We manually integrated our  
97 16S and 12S sequences into the *L. tumana* mitogenome through comparison with the *N.*  
98 *nanikensis* mitogenome (Chen and Du 2017) and re-annotated the assembly with the MITOS  
99 web server (Bernt et al. 2013) as described above.

100

## 101 **Results and Discussion:**

102 The size of the *L. tumana* nuclear genome was estimated to be 536.7-megabases (Mb)  
103 from raw sequence data. Our final *L. tumana* genome assembly was 520.2-Mb with 50% of the  
104 assembly in contigs  $\geq$  4.69-kilobases (kb; Figure 1a, Table 1). The assembled genome size is in

105 line with the only other publicly available stonefly genomes, *I. grammatica* (509.5 Mb) and *A.*  
106 *sulcicollis* (271.9 Mb). The *L. tumana* genome assembly also includes ~3,800 more contigs > 10  
107 kb than the *A. sulcicollis* genome and ~4,600 more than the *I. grammatica* assembly (Figure 1a,  
108 Table 1). All associated data for the resources detailed in this study, including both raw reads and  
109 assemblies, are available as part of GenBank BioProject PRJNA472568 (mitogenome:  
110 MH374046, nuclear genome: SAMN09295077, raw reads: SRP148706).

111 The meltwater stonefly's nuclear genome is similarly A/T-rich (58.4%) to the other  
112 stoneflies (58–60%; Table 1), ants (55–67%; Gadau et al. 2012), *Drosophila melanogaster*  
113 (58%), *Anopheles gambiae* (56%), and the honeybee, *Apis mellifera* (67%, The Honeybee  
114 Genome Sequencing Consortium 2006). However, the *L. tumana* genome is far more complete in  
115 terms of genic regions than both existing stonefly assemblies with 92.8% of BUSCO reference  
116 genes either complete (70.6%) or fragmented (22.2%) versus 80.8% for *A. sulcicollis* (50.5%  
117 complete, 31.3% fragmented) and just 50.1% for *I. grammatica* (13.3% complete, 36.8%  
118 fragmented; Figure 1b, Table 1).

119 The *L. tumana* mitogenome is nearly complete, covering 15,014-bp, including all 13  
120 protein-coding genes, 21 tRNA genes, both rRNA genes, and is only missing the control region  
121 (Figure 2). The organization of the *L. tumana* mitogenome is similar to that of *N. nankinensis*,  
122 the only other mitogenome available for the family Nemouridae. In *N. nankinensis*, the control  
123 region is ~1-kb which indicates that the complete *L. tumana* mitogenome is likely around 16-kb.  
124 This predicted size would fall in line with mitogenome sizes reported for other stoneflies (Chen  
125 and Du 2017). Our inability to resolve the control region is also unsurprising. In *N. nankinensis*,  
126 the control region contains a large ~1-kb repeat region which is inherently difficult to resolve  
127 without targeted long-range PCR re-sequencing or longer read high-throughput sequencing.

128

## 129 **Conclusion:**

130 The increasing availability of genome assemblies for a wide array of organisms is rapidly  
131 expanding the scope and comparative power of modern genome biology (Hotaling and Kelley  
132 2019). With more than 4,600 contigs longer than 10-kb and ~70% of genes assembled in their  
133 complete form, the *L. tumana* nuclear genome provides new opportunity for exploring genome  
134 evolution within Plecoptera, a highly diverse, globally distributed insect order, or at higher levels  
135 of taxonomic organization (e.g., across all insects). Specifically, the *L. tumana* genome could be

136 mined for genes for phylogenomic studies (e.g., Li et al. 2007; Borowiec, Lee, Chiu, and  
137 Plachetzki 2015) or more targeted, comparative assessments of specific genes or gene families  
138 across many taxa to clarify evolutionary shifts and/or copy number variation (e.g., Baalsrud et al.  
139 2017).

140 Moreover, single-copy orthologous genes compared among species can provide a means  
141 for quantifying differences in evolutionary rates across diverse taxa (e.g., Honeybee Genome  
142 Sequencing Consortium 2006) and/or to identify rapidly evolving genes that underlie  
143 evolutionary transitions of interest. In the case of stoneflies and aquatic biodiversity in general,  
144 little is known of the evolutionary changes underlying the shift to an aquatic larval stage that is  
145 common among many orders (e.g., Plecoptera, Ephemeroptera, Trichoptera). With the addition  
146 of the *L. tumana* nuclear genome reported here to the recently published caddisfly (*S.*  
147 *tienmushanensis*, Order Trichoptera, Luo et al. 2018) and mayfly (*E. danica*, Order  
148 Ephemeroptera, Polechau et al. 2014) genomes, the stage is now set for broad, genome-scale  
149 investigations of how this major life history transition occurred across three globally distributed  
150 insect orders.

151 Future efforts to refine both assemblies, including the incorporation of longer reads (e.g.,  
152 generated using Pacific Biosciences sequencing technology, Utturkar et al. 2014) will yield  
153 greater insight into the genome biology of *L. tumana*, stoneflies, and aquatic insects broadly.  
154 Still, the resources provided here, and particularly the most complete stonefly nuclear genome  
155 published thus far, represent an important step towards empowering modern stonefly research, a  
156 globally relevant group of aquatic insects that has been largely overlooked in the genomic age.  
157

#### 158 **Acknowledgements:**

159 We thank Alan Lemmon and Emily Lemmon for advice and assistance with sequencing. This  
160 research was supported by the University of Kentucky (UK) and National Science Foundation  
161 (DEB-0949532). Computational resources were provided by the UK Center for Computational  
162 Sciences and the Lipscomb High Performance Computing Cluster, as well as the Washington  
163 State University Center for Institutional Research Computing.

164

#### 165 **Declaration of Interest:**

166 The authors declare no financial interest or benefit stemming from this research.

167 **References:**

- 168 Andrews, S. (2010), 'FastQC: a quality control tool for high throughput sequence data',  
169 <https://www.bioinformatics.babraham.ac.uk/projects/download.html#fastqc>
- 170 Baalsrud, H. T., Tørresen, O. K., Solbakken, M. H., Salzburger, W., Hanel, R., Jakobsen, K. S.,  
171 and Jentoft, S. (2017), 'De novo gene evolution of antifreeze glycoproteins in codfishes  
172 revealed by whole genome sequence data', *Molecular Biology and Evolution*, 35, 593–606.
- 173 Bankevich, A., Nurk, S., Antipov, D., Gurevich, A.A., Dvorkin, M., Kulikov, A.S., Lesin, V.M.,  
174 Nikolenko, S.I., Pham, S., and Prjibelski, A.D. (2012), 'SPAdes: a new genome assembly  
175 algorithm and its applications to single-cell sequencing', *Journal of Computational Biology*,  
176 19, 455–477.
- 177 Baumann, R.W., and Kondratieff, B.C. (2010), 'The stonefly genus *Lednia* in North America  
178 (Plecoptera: Nemouridae)', *Illiesia*, 6, 315–327.
- 179 Baumman, R.W., and Call, R.G. (2012), '*Lednia tetonica*, a new species of stonefly from  
180 Wyoming (Plecoptera: Nemouridae)', *Illiesia*, 8, 104–110.
- 181 Bernt, M., Donath, A., Jühling, F., Externbrink, F., Florentz, C., Fritsch, G., Pütz, J.,  
182 Middendorf, M., and Stadler, P.F. (2013), 'MITOS: improved de novo metazoan  
183 mitochondrial genome annotation', *Molecular Phylogenetics and Evolution*, 69, 313–319.
- 184 Béthoux, O., Cui, Y., Kondratieff, B., Stark, B., and Ren, D. (2011), 'At last, a Pennsylvanian  
185 stem-stonefly (Plecoptera) discovered', *BMC Evolutionary Biology*, 11, 248.
- 186 Borowiec, M. L., Lee, E. K., Chiu, J. C., and Plachetzki, D. C. (2015), 'Extracting phylogenetic  
187 signal and accounting for bias in whole-genome data sets supports the Ctenophora as sister  
188 to remaining Metazoa', *BMC Genomics*, 16, 987.
- 189 Bradnam, K.R., Fass, J.N., Alexandrov, A., Baranay, P., Bechner, M., Birol, I., Boisvert, S.,  
190 Chapman, J.A., Chapuis, G., and Chikhi, R. (2013), 'Assemblathon 2: evaluating de novo  
191 methods of genome assembly in three vertebrate species', *GigaScience*, 2, 10.

- 192 Cao, J. J., Wang, Y., Huang, Y. R., and Li, W. H. (2019), 'Mitochondrial genomes of the  
193 stoneflies *Mesonemoura metafiligera* and *Mesonemoura tritaenia* (Plecoptera,  
194 Nemouridae), with a phylogenetic analysis of Nemouroidea', *ZooKeys*, 835, 43.
- 195 Chen, Z.-T., and Du, Y.-Z. (2017), 'First mitochondrial genome from Nemouridae (Plecoptera)  
196 reveals novel features of the elongated control region and phylogenetic implications',  
197 *International Journal of Molecular Sciences*, 18, 996.
- 198 DeWalt R.E., Kondratieff B.C., and Sandberg J.B. 2015, 'Order Plecoptera', Thorp J., Rogers  
199 D.C. (eds), *Ecology and General Biology: Freshwater Invertebrates*. – Academic Press,  
200 Cambridge.
- 201 Dierckxsens, N., Mardulyn, P., and Smits, G. (2016), 'NOVOPlasty: de novo assembly of  
202 organelle genomes from whole genome data', *Nucleic Acids Research*, 45, e18.
- 203 Gadau, J., Helmkampf, M., Nygaard, S., Roux, J., Simola, D.F., Smith, C.R., Suen, G., Wurm,  
204 Y., and Smith, C.D. (2012), 'The genomic impact of 100 million years of social evolution  
205 in seven ant species', *Trends in Genetics*, 28, 14–21.
- 206 Giersch, J.J., Hotaling, S., Kovach, R.P., Jones, L.A., and Muhlfeld, C.C. (2017), 'Climate-  
207 induced glacier and snow loss imperils alpine stream insects', *Global Change Biology*, 23,  
208 2577–2589.
- 209 Honeybee Genome Sequencing Consortium. (2006), 'Insights into social insects from the  
210 genome of the honeybee *Apis mellifera*', *Nature*, 443, 931.
- 211 Hotaling, S., Finn, D.S., Giersch, J.J., Weisrock, D.W., and Jacobsen, D. (2017), 'Climate change  
212 and alpine stream biology: progress, challenges, and opportunities for the future',  
213 *Biological Reviews*, 92, 2024–2045.
- 214 Hotaling, S., Giersch, J.J., Finn, D.S., Tronstad, L.M., Jordan, S., Serpa, L.E., Call, R.G.,  
215 Muhlfeld, C.C., and Weisrock, D.W. (2019), 'Congruent population genetic structure but  
216 differing depths of divergence for three alpine stoneflies with similar ecology and  
217 geographic distributions', *Freshwater Biology*, 64, 335–347.



- 218 Hotaling, S., and Kelley, J.L. (2019), ‘The rising tide of high-quality genomic resources’,  
219 *Molecular Ecology Resources*, 19, 567–569.
- 220 Hotaling, S., Muhlfeld, C.C., Giersch, J.J., Ali, O.A., Jordan, S., Miller, M.R., Luikart, G., and  
221 Weisrock, D.W. (2018), ‘Demographic modelling reveals a history of divergence with gene  
222 flow for a glacially tied stonefly in a changing post-Pleistocene landscape’, *Journal of*  
223 *Biogeography*, 45, 304–317.
- 224 Jordan, S., Giersch, J.J., Muhlfeld, C.C., Hotaling, S., Fanning, L., Tappenbeck, T.H., and  
225 Luikart, G. (2016), ‘Loss of genetic diversity and increased subdivision in an endemic  
226 alpine stonefly threatened by climate change’, *PLoS One*, 11, e0157386.
- 227 Krueger, F. (2015), ‘Trim Galore!: A wrapper tool around Cutadapt and FastQC to consistently  
228 apply quality and adapter trimming to FastQ files’.  
229 [https://www.bioinformatics.babraham.ac.uk/projects/trim\\_galore/](https://www.bioinformatics.babraham.ac.uk/projects/trim_galore/)
- 230 Li, C., Ortí, G., Zhang, G., and Lu, G. (2007), ‘A practical approach to phylogenomics: the  
231 phylogeny of ray-finned fish (Actinopterygii) as a case study’, *BMC Evolutionary*  
232 *Biology*, 7, 44.
- 233 Li, H., Handsaker, B., Wysoker, A., Fennell, T., Ruan, J., Homer, N., Marth, G., Abecasis, G.,  
234 and Durbin. R. (2009) ‘The sequence alignment/map format and SAMtools’,  
235 *Bioinformatics*, 25, 2078–2079.
- 236 Li, H. (2013), ‘Aligning sequence reads, clone sequences and assembly contigs with BWA-  
237 MEM’, *arXiv*, 1303, 3997.
- 238 Luo, S., Tang, M., Frandsen, P. B., Stewart, R. J., and Zhou, X. (2018), ‘The genome of an  
239 underwater architect, the caddisfly *Stenopsyche tienmushanensis* Hwang (Insecta:  
240 Trichoptera)’, *GigaScience*, Doi: 10.1093/gigascience/giy143.
- 241 Macdonald, H.C., Cunha, L., and Bruford, M.W. (2016), ‘Development of genomic resources for  
242 four potential environmental bioindicator species: *Isoperla grammatica*, *Amphinemura*  
243 *sulcicollis*, *Oniscus asellus* and *Baetis rhodani*’, *bioRxiv*, 046227.

- 244 Macdonald, H.C., Ormerod, S.J., and Bruford, M.W. (2017), 'Enhancing capacity for freshwater  
245 conservation at the genetic level: a demonstration using three stream  
246 macroinvertebrates', *Aquatic Conservation: Marine and Freshwater Ecosystems*, 27, 452–  
247 461.
- 248 Muhlfeld, C.C., Giersch, J.J., Hauer F.R., Pederson, G.T., Luikart, G., Peterson, D.P., Downs,  
249 C.C., and Fagre, D.P. (2011), 'Climate change links fate of glaciers and an endemic alpine  
250 invertebrate', *Climatic Change*, 106, 337–345.
- 251 Poelchau, M., Childers, C., Moore, G., Tsavatapalli, V., Evans, J., Lee, C. Y., and Hackett, K.  
252 (2014), 'The i5k Workspace@ NAL—enabling genomic data access, visualization and  
253 curation of arthropod genomes', *Nucleic Acids Research*, 43, D714–D719.
- 254 Ricker, W. E. (1952), *Systematic studies in Plecoptera*, Indiana University, Bloomington.
- 255 Simão, F.A., Waterhouse, R.M., Ioannidis, P., Kriventseva, E.V., and Zdobnov, E.M. (2015),  
256 'BUSCO: assessing genome assembly and annotation completeness with single-copy  
257 orthologs', *Bioinformatics*, 31, 3210–3212.
- 258 Simpson, J.T. (2014), 'Exploring genome characteristics and sequence quality without a  
259 reference', *Bioinformatics*, 30, 1228–1235.
- 260 Tronstad, L.M., Hotaling, S., and Bish, J.C. (2016), 'Longitudinal changes in stream invertebrate  
261 assemblages of Grand Teton National Park, Wyoming', *Insect Conservation and Diversity*,  
262 9, 320–331.
- 263 US Fish & Wildlife Service. (2016), 'Endangered and threatened wildlife and plants; 12-month  
264 finding on a petition to list the western glacier stonefly as an endangered or threatened  
265 species; proposed threatened species status for Meltwater Lednian Stonefly and Western  
266 Glacier Stonefly', *Federal Register*, 81, 68379–68397.
- 267 Utturkar, S.M., Klingeman, D.M., Land, M.L., Schadt, C.W., Doktycz, M.J., Pelletier, D.A., and  
268 Brown, S.D. (2014), 'Evaluation and validation of de novo and hybrid assembly techniques  
269 to derive high-quality genome sequences', *Bioinformatics*, 30, 2709–2716.

270 **Tables:**

271 Table 1. Assembly statistics for the nuclear genome of *Lednia tumana* (Ricker, 1952; Plecoptera:  
272 Nemouridae) and two other stonefly species, *Amphinemura sulcicollis* (Stephens, 1836) and  
273 *Isoperla grammatica* (Poda, 1761; Macdonald et al. 2016; Macdonald et al. 2017). BUSCOs:  
274 Single-copy, orthologous genes known to be highly conserved among insects. A total of 1,658  
275 BUSCOs were searched.

|                       | <i>L. tumana</i> | <i>A. sulcicollis</i> | <i>I. grammatica</i> |
|-----------------------|------------------|-----------------------|----------------------|
| Estimated genome size | 536,700,000      | n/a                   | n/a                  |
| Assembly size         | 520,200,814      | 271,924,966           | 509,522,935          |
| Coverage              | ~60x             | ~1.4x                 | ~0.7x                |
| Contigs > 1-kb        | 74,445           | 51,555                | 53,204               |
| Contigs > 10-kb       | 4,608            | 849                   | 4                    |
| Contig N50            | 4.69-kb          | 0.85-kb               | 0.46-kb              |
| %A/T                  | 58.4             | 58.2                  | 59.9                 |
| %G/C                  | 41.5             | 42.8                  | 40.1                 |
| %N                    | 0.1              | 0                     | 0                    |
| Complete BUSCOs       | 1,172 (70.6%)    | 837 (50.5%)           | 221 (13.3%)          |
| Fragmented BUSCOs     | 368 (22.2%)      | 519 (31.3%)           | 610 (36.8%)          |
| Missing BUSCOs        | 118 (7.2%)       | 302 (18.2%)           | 827 (49.9%)          |

276

277 **Figures:**

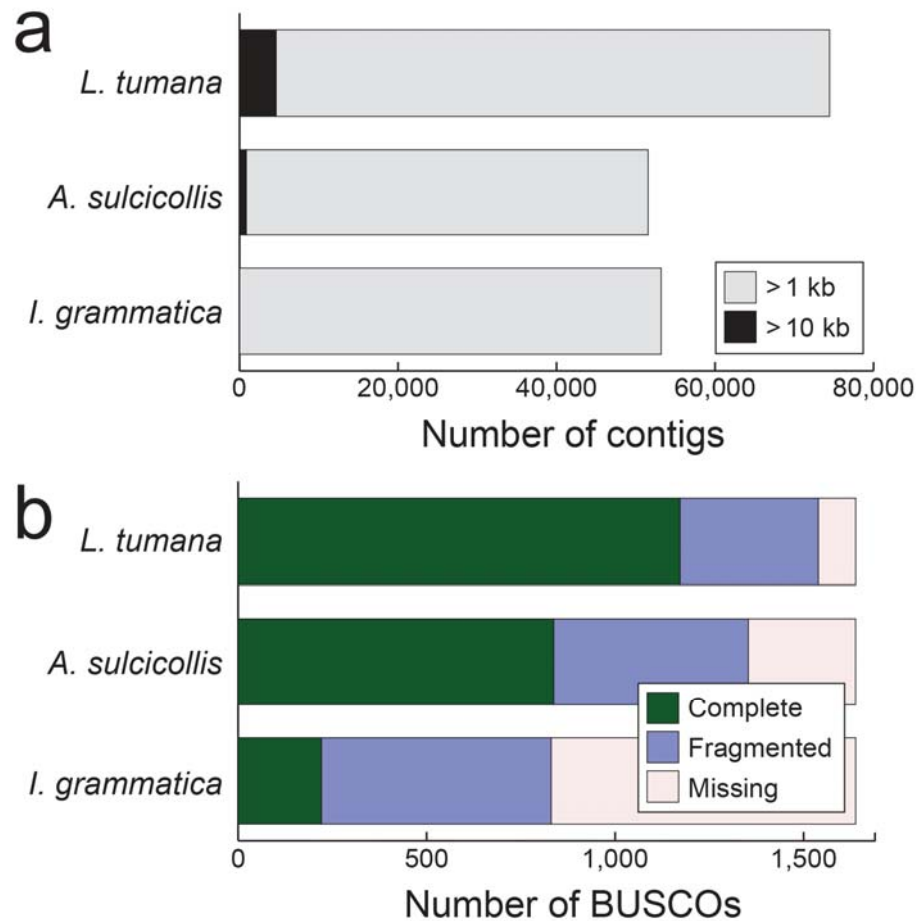

278

279 Figure 1. Comparisons of the gene content and contiguity of the *Lednia tumana* (Ricker, 1952;  
280 Plecoptera: Nemouridae) nuclear genome to the two other previously published stonefly  
281 genomes for *Amphinemura sulcicollis* (Stephens, 1836) and *Isoperla grammatica* (Poda, 1761;  
282 Macdonald et al. 2016; Macdonald et al. 2017). (a) The number of contigs > 1-kb and > 10-kb  
283 across the three stonefly genomes. For *I. grammatica*, the assembly contains just four contigs  
284 greater than 10-kb. (b) Presence of highly conserved, single-copy orthologous genes (BUSCOs)  
285 across the three stonefly genomes.

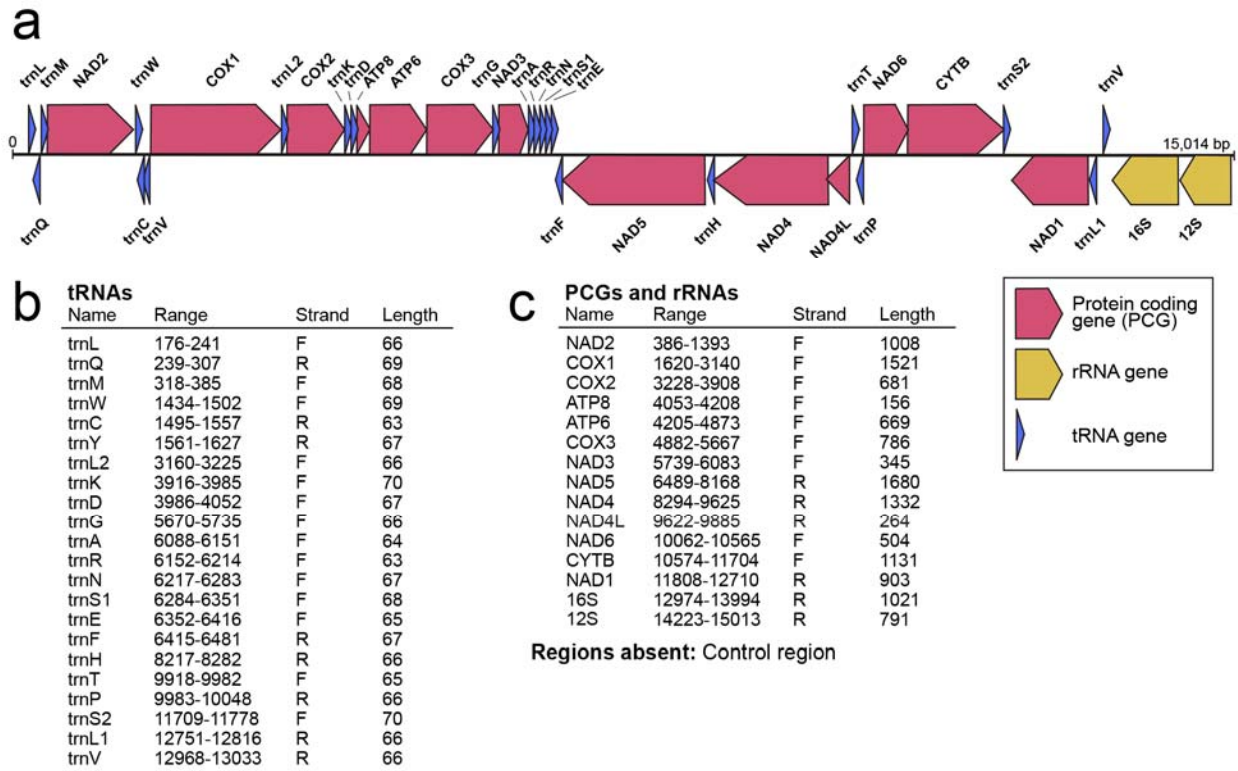

286

287 Figure 2. (a) The mitogenome of *Lednia tumana* (Ricker, 1952; Plecoptera: Nemouridae). (b)

288 Locations of tRNAs. (c) Locations of protein coding (PCGs) and rRNA genes.
